# Supplementary material
Source: MDPI journal article supplement (https://www.mdpi.com/2032-6653/14/11/303)
Supplement: s1 [file s1]

**Table S1.** Relevant studies within V2G research field

|                                               | NO.  | EV | V2G | Schedule | Smart grid | Renewable energy | Energy storage | Battery | Energy system | Frequency regulation | Distributed generation | Voltage control | Economic analysis | Communication network |
|-----------------------------------------------|------|----|-----|----------|------------|------------------|----------------|---------|---------------|----------------------|------------------------|-----------------|-------------------|-----------------------|
| <b>3.1.1<br/>Energy Storage</b>               | [17] | √  | √   | —        | —          | —                | —              | —       | —             | —                    | —                      | —               | —                 | —                     |
|                                               | [19] | √  | √   | —        | —          | √                | √              | √       | —             | —                    | —                      | —               | —                 | —                     |
|                                               | [21] | √  | √   | —        | —          | —                | —              | √       | √             | √                    | —                      | —               | √                 | —                     |
|                                               | [22] | √  | √   | —        | —          | —                | —              | —       | —             | —                    | —                      | —               | √                 | —                     |
|                                               | [23] | √  | √   | —        | —          | —                | —              | √       | —             | —                    | √                      | —               | —                 | —                     |
|                                               | [24] | √  | √   | —        | —          | —                | √              | —       | √             | —                    | —                      | —               | —                 | —                     |
|                                               | [25] | √  | √   | —        | —          | √                | √              | —       | —             | —                    | —                      | —               | —                 | —                     |
|                                               | [26] | √  | √   | —        | —          | √                | √              | √       | —             | —                    | —                      | —               | √                 | —                     |
|                                               | [27] | √  | √   | —        | —          | —                | √              | √       | —             | —                    | —                      | —               | —                 | —                     |
| <b>3.1.2<br/>Renewable<br/>Energy Sources</b> | [28] | √  | √   | —        | —          | √                | —              | √       | —             | —                    | —                      | —               | √                 | —                     |
|                                               | [29] | √  | √   | —        | —          | —                | —              | —       | —             | —                    | √                      | —               | —                 | —                     |
|                                               | [30] | √  | √   | —        | —          | √                | —              | —       | √             | —                    | —                      | —               | —                 | —                     |
|                                               | [31] | √  | √   | —        | —          | √                | √              | —       | —             | √                    | —                      | —               | —                 | —                     |
|                                               | [32] | √  | √   | —        | —          | √                | —              | —       | —             | —                    | √                      | —               | —                 | —                     |
|                                               | [33] | √  | √   | —        | √          | √                | √              | —       | —             | —                    | —                      | —               | —                 | —                     |
|                                               | [34] | √  | √   | —        | √          | —                | —              | √       | —             | —                    | —                      | —               | —                 | —                     |
|                                               | [35] | √  | √   | —        | —          | —                | —              | —       | —             | —                    | —                      | —               | —                 | —                     |
|                                               | [36] | √  | √   | —        | —          | √                | —              | —       | —             | —                    | —                      | —               | —                 | —                     |
|                                               | [37] | √  | √   | —        | —          | √                | —              | √       | —             | —                    | —                      | —               | —                 | —                     |
|                                               | [38] | √  | √   | —        | —          | √                | —              | —       | √             | —                    | —                      | —               | —                 | —                     |
|                                               | [39] | √  | √   | —        | —          | √                | —              | —       | √             | —                    | —                      | —               | —                 | —                     |
|                                               | [40] | √  | √   | —        | √          | √                | —              | —       | —             | —                    | √                      | —               | —                 | —                     |

|                                           |      |   |   |   |   |   |   |   |   |   |   |   |   |   |
|-------------------------------------------|------|---|---|---|---|---|---|---|---|---|---|---|---|---|
|                                           | [41] | √ | √ | — | — | √ | — | — | — | — | — | — | — | — |
|                                           | [42] | √ | √ | — | — | √ | √ | — | — | — | — | — | — | — |
| <b>3.1.3<br/>Scheduling</b>               | [43] | √ | √ | √ | — | — | — | √ | — | — | √ | — | — | — |
|                                           | [44] | √ | √ | √ | — | — | — | √ | — | — | — | — | — | — |
|                                           | [45] | √ | √ | √ | — | — | √ | — | — | — | — | — | √ | — |
|                                           | [46] | √ | √ | √ | — | — | — | — | — | — | — | — | — | — |
|                                           | [47] | √ | √ | √ | — | — | — | — | — | — | — | — | √ | — |
|                                           | [48] | √ | √ | √ | — | — | — | √ | — | — | — | — | √ | — |
|                                           | [49] | √ | √ | √ | √ | √ | — | — | — | — | — | — | — | — |
|                                           | [50] | √ | √ | √ | — | — | — | — | — | — | — | — | — | — |
|                                           | [51] | √ | √ | √ | — | √ | — | — | — | — | — | — | — | — |
|                                           | [52] | √ | √ | √ | — | √ | — | — | — | — | — | — | — | — |
|                                           | [53] | √ | √ | √ | √ | — | — | √ | — | — | — | — | — | — |
|                                           | [54] | √ | √ | √ | — | — | √ | — | √ | — | — | — | √ | — |
| <b>3.2.1<br/>Frequency<br/>Regulation</b> | [56] | √ | √ | — | — | — | — | √ | — | √ | — | — | — | — |
|                                           | [57] | √ | √ | — | — | — | — | √ | — | √ | — | — | — | — |
|                                           | [58] | √ | √ | √ | — | — | — | — | — | √ | — | — | — | — |
|                                           | [59] | √ | √ | √ | — | — | — | √ | — | √ | — | — | √ | — |
|                                           | [60] | √ | √ | √ | — | — | — | √ | — | √ | — | — | √ | — |
|                                           | [61] | √ | √ | — | √ | — | — | — | √ | √ | — | — | — | — |
| <b>3.2.2<br/>Voltage<br/>Control</b>      | [62] | √ | √ | — | — | √ | — | — | — | — | √ | √ | — | — |
|                                           | [63] | √ | √ | — | — | — | — | — | — | — | √ | √ | — | — |
|                                           | [64] | √ | √ | — | — | — | — | — | — | — | — | √ | — | — |
|                                           | [65] | √ | √ | — | — | — | — | — | — | — | — | √ | — | — |
|                                           | [66] | √ | √ | — | √ | — | — | √ | — | — | — | √ | — | — |
|                                           | [67] | √ | √ | — | — | — | — | √ | — | √ | — | √ | — | — |

|                                    |      |   |   |   |   |   |   |   |   |   |   |   |   |   |
|------------------------------------|------|---|---|---|---|---|---|---|---|---|---|---|---|---|
|                                    | [68] | √ | √ | — | — | — | — | — | — | — | — | √ | √ | — |
|                                    | [69] | √ | √ | — | — | — | — | √ | — | — | — | √ | √ | — |
| 3.3.1.<br>Smart Grid               | [71] | √ | √ | — | √ | √ | — | — | — | — | — | — | — | — |
|                                    | [72] | √ | √ | — | √ | — | — | — | — | — | — | — | — | — |
|                                    | [73] | √ | √ | — | √ | — | — | √ | — | — | — | — | — | — |
|                                    | [74] | √ | √ | — | √ | — | — | — | √ | — | — | — | — | — |
|                                    | [75] | √ | √ | — | √ | √ | — | √ | — | √ | — | — | — | — |
|                                    | [76] | √ | √ | — | √ | — | — | — | — | — | √ | — | — | — |
|                                    | [77] | √ | √ | — | √ | — | — | √ | — | — | — | — | — | — |
|                                    | [78] | √ | √ | — | √ | — | — | — | — | — | — | — | — | — |
|                                    | [79] | √ | √ | — | √ | √ | — | — | — | — | — | — | — | — |
|                                    | [81] | √ | √ | √ | √ | — | — | — | — | — | — | — | — | — |
|                                    | [82] | √ | √ | √ | √ | — | — | — | — | — | — | — | √ | — |
|                                    | [83] | √ | √ | √ | √ | — | — | √ | — | — | — | — | — | — |
| 3.3.2<br>Communication<br>Networks | [85] | √ | √ | — | √ | — | — | — | — | — | — | — | — | √ |
|                                    | [86] | √ | √ | — | — | — | — | — | — | — | — | — | — | √ |
|                                    | [87] | √ | √ | — | — | — | — | — | — | — | — | — | — | √ |
|                                    | [88] | √ | √ | — | — | — | — | — | — | — | — | — | — | √ |
|                                    | [89] | √ | √ | — | — | — | — | — | — | — | — | — | — | √ |
|                                    | [90] | √ | √ | — | — | — | — | — | — | — | — | — | — | √ |
|                                    | [91] | √ | √ | — | — | — | — | — | — | — | — | — | — | √ |
|                                    | [92] | √ | √ | — | — | — | — | — | — | — | — | — | — | √ |
|                                    | [93] | √ | √ | — | — | — | — | — | — | — | — | — | — | √ |
